# Supplementary material for: Population Genetics of Bactrocera minax (Diptera: Tephritidae) in China Based on nad4 Gene Sequence
Source: MDPI journal article supplement (doi:10.3390/insects10080236), 2019-08-02
Supplement: s1 [file s1]

**Table S1.** Pairwise comparisons between  $F_{ST}$  values of *nad4* gene fragment from 18 *Bactrocera minax* populations.

| Population | SY      | ZG      | YC      | JZ      | XX      | TY      | LL      | FC      | LZ      | QL      | GY      | WL      | ZX      | WZ      | YY      | WS      | HZ      | JY |
|------------|---------|---------|---------|---------|---------|---------|---------|---------|---------|---------|---------|---------|---------|---------|---------|---------|---------|----|
| SY         | —       |         |         |         |         |         |         |         |         |         |         |         |         |         |         |         |         |    |
| ZG         | 0.192** | —       |         |         |         |         |         |         |         |         |         |         |         |         |         |         |         |    |
| YC         | 0.592** | 0.463** | —       |         |         |         |         |         |         |         |         |         |         |         |         |         |         |    |
| JZ         | 0.204** | 0.169** | 0.629** | —       |         |         |         |         |         |         |         |         |         |         |         |         |         |    |
| XX         | 0.384** | 0.206** | 0.637** | 0.441** | —       |         |         |         |         |         |         |         |         |         |         |         |         |    |
| TY         | 0.056*  | 0.109** | 0.549** | 0.033   | 0.238** | —       |         |         |         |         |         |         |         |         |         |         |         |    |
| LL         | 0.004   | 0.107** | 0.517** | 0.050*  | 0.203** | -0.004  | —       |         |         |         |         |         |         |         |         |         |         |    |
| FC         | 0.502** | 0.381** | 0.657** | 0.541** | 0.254*  | 0.425** | 0.362** | —       |         |         |         |         |         |         |         |         |         |    |
| LZ         | 0.458** | 0.357** | 0.630** | 0.481** | 0.226** | 0.388** | 0.334** | -0.018  | —       |         |         |         |         |         |         |         |         |    |
| QL         | 0.293** | 0.267** | 0.545** | 0.335** | 0.232** | 0.253** | 0.228** | 0.247** | 0.238** | —       |         |         |         |         |         |         |         |    |
| GY         | 0.386** | 0.367** | 0.619** | 0.478** | 0.331** | 0.374** | 0.331** | 0.317** | 0.300** | 0.035*  | —       |         |         |         |         |         |         |    |
| WL         | 0.388** | 0.330** | 0.566** | 0.414** | 0.247** | 0.350** | 0.309** | 0.142** | 0.141** | 0.117** | 0.135** | —       |         |         |         |         |         |    |
| ZX         | 0.502** | 0.253** | 0.712** | 0.643** | 0.150*  | 0.315** | 0.277** | 0.547** | 0.463** | 0.368** | 0.474** | 0.409** | —       |         |         |         |         |    |
| WZ         | 0.720** | 0.649** | 0.744** | 0.761** | 0.681** | 0.693** | 0.639** | 0.550** | 0.530** | 0.570** | 0.617** | 0.480** | 0.796** | —       |         |         |         |    |
| YY         | 0.659** | 0.586** | 0.717** | 0.716** | 0.602** | 0.634** | 0.567** | 0.399** | 0.391** | 0.470** | 0.524** | 0.358** | 0.752** | 0.198** | —       |         |         |    |
| WS         | 0.495** | 0.411** | 0.647** | 0.517** | 0.323** | 0.438** | 0.378** | 0.064*  | 0.060   | 0.272** | 0.343** | 0.161** | 0.534** | 0.455** | 0.252** | —       |         |    |
| HZ         | 0.228** | 0.165** | 0.630** | 0.045   | 0.313** | 0.062*  | 0.075*  | 0.443** | 0.393** | 0.249** | 0.387** | 0.332** | 0.528** | 0.735** | 0.679** | 0.443** | —       |    |
| JY         | 0.418** | 0.335** | 0.542** | 0.420** | 0.249** | 0.367** | 0.330** | 0.165** | 0.177** | 0.272** | 0.326** | 0.214** | 0.398** | 0.468** | 0.363** | 0.208** | 0.367** | —  |

Population abbreviations are defined in Table 1. \*  $P < 0.05$ , \*\*  $P < 0.01$

**Table S2.** Estimates of gene flow between 18 *Bactrocera minax* populations.

| Population | $\theta$ | M                       |                         |                         |                         |                         |                         |                         |                         |                         |                         |                        |                         |                         |                         |                         |                        |                         |                         |
|------------|----------|-------------------------|-------------------------|-------------------------|-------------------------|-------------------------|-------------------------|-------------------------|-------------------------|-------------------------|-------------------------|------------------------|-------------------------|-------------------------|-------------------------|-------------------------|------------------------|-------------------------|-------------------------|
|            |          | SY→i                    | ZG→i                    | YC→i                    | JZ→i                    | XX→i                    | TY→i                    | LL→i                    | FC→i                    | LZ→i                    | QL→i                    | GY→i                   | WL→i                    | ZX→i                    | WZ→i                    | YY→i                    | WS→i                   | HZ→i                    | JY→i                    |
| SY         | 0.003    | —                       | 451.7<br>(110.0–563.3)  | 401.0<br>(36.0–750.7)   | 583.7<br>(234.0–1000.0) | 210.3<br>(0.0–610.7)    | 322.3<br>(0.0–844.7)    | 510.3<br>(109.3–1000.0) | 430.3<br>(80.0–836.7)   | 281.7<br>(0.0–754.0)    | 499.7<br>(120.7–944.0)  | 427.7<br>(38.0–808.7)  | 250.3<br>(0.0–597.3)    | 282.3<br>(0.0–518.0)    | 391.7<br>(0.0–825.3)    | 333.7<br>(0.0–756.7)    | 381.7<br>(15.3–784.7)  | 621.0<br>(301.3–988.0)  | 499.0<br>(0.0–470.1)    |
| ZG         | 0.040    | 319.7<br>(30.0–487.3)   | —                       | 131.0<br>(0.0–379.3)    | 219.0<br>(0.0–429.3)    | 268.3<br>(0.0–561.3)    | 533.7<br>(290.0–982.7)  | 99.0<br>(0.0–292.0)     | 180.3<br>(20.7–580.7)   | 180.3<br>(0.0–488.7)    | 300.3<br>(0.0–704.7)    | 317.0<br>(2.7–43.3)    | 217.0<br>(0.0–722.7)    | 185.0<br>(0.0–538.7)    | 47.0<br>(0.0–182.0)     | 117.7<br>(0.0–378.0)    | 172.3<br>(0.0–548.7)   | 295.7<br>(0.0–663.3)    | 153.7<br>(0.0–518.0)    |
| YC         | 0.002    | 593.7<br>(224.7–990.7)  | 143.0<br>(0.0–442.7)    | —                       | 188.3<br>(0.0–691.3)    | 141.7<br>(0.0–587.3)    | 257.7<br>(0.0–668.0)    | 299.0<br>(0.0–690.0)    | 351.0<br>(0.0–542.0)    | 335.7<br>(0.0–769.3)    | 411.7<br>(25.3–643.3)   | 307.7<br>(2.7–571.3)   | 167.0<br>(0.0–420.0)    | 317.7<br>(0.0–643.3)    | 301.7<br>(3.3–718.0)    | 389.0<br>(0.0–530.7)    | 141.0<br>(0.0–451.3)   | 469.7<br>(114.7–864.7)  | 415.7<br>(0.0–429.4)    |
| JZ         | 0.001    | 501.3<br>(0.0–543.0)    | 610.3<br>(316.0–1000.0) | 476.3<br>(130.0–781.3)  | —                       | 715.7<br>(340.0–995.3)  | 357.7<br>(0.0–761.3)    | 838.3<br>(562.0–1000.0) | 622.3<br>(496.7–1000.0) | 605.7<br>(398.0–1000.0) | 621.7<br>(224.7–1000.0) | 451.0<br>(0.0–462.7)   | 733.7<br>(320.7–1000.0) | 627.0<br>(444.0–993.3)  | 293.0<br>(0.0–712.7)    | 477.1<br>(0.0–529.0)    | 470.3<br>(0.0–838.7)   | 641.0<br>(220.7–1000.0) | 481.2<br>(0.0–492.3)    |
| XX         | 0.001    | 475.0<br>(0.0–531.3)    | 631.0<br>(351.3–996.7)  | 559.7<br>(202.0–1000.0) | 715.0<br>(528.7–1000.0) | —                       | 578.3<br>(185.3–990.7)  | 519.0<br>(92.7–852.0)   | 665.7<br>(472.0–995.3)  | 667.7<br>(296.0–1000.0) | 566.3<br>(129.3–1000.0) | 325.0<br>(0.0–600.0)   | 665.7<br>(304.0–1000.0) | 719.7<br>(390.0–1000.0) | 537.6<br>(516.3–993.3)  | 496.3<br>(122.0–916.0)  | 534.3<br>(526.6–978.7) | 476.2<br>(445.0–1000.0) | 387.7<br>(0.0–752.0)    |
| TY         | 0.027    | 804.3<br>(488.7–1000.0) | 435.0<br>(134.7–757.3)  | 557.0<br>(154.0–989.3)  | 554.3<br>(184.7–999.3)  | 650.3<br>(288.0–984.0)  | —                       | 441.7<br>(68.7–697.3)   | 108.3<br>(0.0–462.7)    | 171.7<br>(0.0–451.3)    | 141.7<br>(0.0–457.3)    | 345.0<br>(0.0–589.3)   | 211.7<br>(0.0–549.3)    | 246.3<br>(0.0–553.3)    | 280.3<br>(0.0–67.3)     | 510.2<br>(0.0–521.0)    | 494.3<br>(32.7–888.7)  | 203.0<br>(0.0–443.3)    | 182.3<br>(0.0–495.3)    |
| LL         | 0.021    | 395.7<br>(0.0–784.7)    | 331.7<br>(0.0–706.7)    | 225.7<br>(0.0–634.7)    | 341.7<br>(0.0–721.3)    | 111.0<br>(0.0–349.2)    | 508.3<br>(367.3–1000.0) | —                       | 172.3<br>(0.0–762.0)    | 492.3<br>(88.7–718.7)   | 367.7<br>(4.0–790.0)    | 603.7<br>(502.0–998.0) | 547.0<br>(103.0–992.0)  | 452.3<br>(0.0–888.0)    | 542.3<br>(130.0–900.7)  | 473.7<br>(246.7–745.3)  | 322.3<br>(0.0–763.3)   | 697.7<br>(396.7–990.7)  | 767.7<br>(399.3–1000.0) |
| FC         | 0.001    | 653.7<br>(337.3–1000.0) | 625.0<br>(261.3–994.0)  | 621.0<br>(120.7–978.0)  | 543.5<br>(536.3–1000.0) | 679.7<br>(292.0–996.0)  | 603.0<br>(241.0–1000.0) | 510.3<br>(90.7–679.3)   | —                       | 603.7<br>(230.0–984.0)  | 707.7<br>(494.7–1000.0) | 489.6<br>(459.0–989.3) | 579.0<br>(535.3–1000.0) | 701.0<br>(300.7–1000.0) | 739.7<br>(285.3–1000.0) | 377.0<br>(0.0–590.0)    | 472.3<br>(0.0–844.7)   | 450.5<br>(414.3–1000.0) | 652.3<br>(280.0–1000.0) |
| LZ         | 0.001    | 582.3<br>(392.7–978.0)  | 398.3<br>(0.0–418.9)    | 459.0<br>(0.0–491.0)    | 671.0<br>(380.0–1000.0) | 558.3<br>(502.0–983.3)  | 723.0<br>(430.0–1000.0) | 655.0<br>(384.7–1000.0) | 581.7<br>(203.3–994.0)  | —                       | 473.0<br>(140.0–810.7)  | 375.0<br>(0.0–780.7)   | 659.0<br>(323.0–1000.0) | 389.7<br>(0.0–552.7)    | 542.3<br>(480.0–1000.0) | 659.7<br>(510.0–1000.0) | 487.2<br>(0.0–495.0)   | 540.3<br>(514.1–1000.0) | 394.3<br>(0.0–399.3)    |
| QL         | 0.006    | 676.3<br>(490.7–998.7)  | 627.7<br>(532.7–994.0)  | 583.7<br>(152.7–1000.0) | 337.7<br>(0.0–787.3)    | 639.0<br>(448.7–1000.0) | 687.0<br>(325.3–1000.0) | 622.3<br>(292.0–976.0)  | 199.0<br>(0.0–612.0)    | 491.7<br>(108.7–907.3)  | —                       | 481.7<br>(0.0–493.0)   | 115.0<br>(0.0–484.0)    | 136.3<br>(0.0–426.7)    | 113.0<br>(0.0–386.0)    | 248.3<br>(0.0–691.3)    | 271.0<br>(0.0–744.0)   | 140.3<br>(0.0–655.3)    | 253.7<br>(0.0–690.7)    |

| Population | $\theta$ | M                           |                             |                           |                                 |                             |                                 |                                 |                                 |                                 |                                 |                                 |                             |                                 |                             |                           |                                   |                                |                                |
|------------|----------|-----------------------------|-----------------------------|---------------------------|---------------------------------|-----------------------------|---------------------------------|---------------------------------|---------------------------------|---------------------------------|---------------------------------|---------------------------------|-----------------------------|---------------------------------|-----------------------------|---------------------------|-----------------------------------|--------------------------------|--------------------------------|
|            |          | SY $\rightarrow$ i          | ZG $\rightarrow$ i          | YC $\rightarrow$ i        | JZ $\rightarrow$ i              | XX $\rightarrow$ i          | TY $\rightarrow$ i              | LL $\rightarrow$ i              | FC $\rightarrow$ i              | LZ $\rightarrow$ i              | QL $\rightarrow$ i              | GY $\rightarrow$ i              | WL $\rightarrow$ i          | ZX $\rightarrow$ i              | WZ $\rightarrow$ i          | YY $\rightarrow$ i        | WS $\rightarrow$ i                | HZ $\rightarrow$ i             | JY $\rightarrow$ i             |
| GY         | 0.0026   | 277.0<br>(0.0–69<br>4.7)    | 364.3<br>(0.0–70<br>8.0)    | 240.3<br>(0.0–4<br>84.0)  | 683.0<br>(391.3<br>–1000.<br>0) | 272.3<br>(0.0–76<br>2.0)    | 283.7<br>(0.0–3<br>61.3)        | 481.0<br>(0.0–8<br>44.0)        | 354.3<br>(0.0–8<br>03.3)        | 235.7<br>(0.0–6<br>30.0)        | 237.7<br>(0.0–5<br>98.7)        | —                               | 469.7<br>(40.7–8<br>27.3)   | 685.0<br>(300.0<br>–988.7<br>)  | 337.0<br>(22.7–6<br>03.3)   | 453.0<br>(0.0–8<br>45.3)  | 490.3<br>(122.0<br>–811.3<br>)    | 265.0<br>(0.0–5<br>22.7)       | 600.3<br>(497.3<br>–989.3<br>) |
| WL         | 0.003    | 555.7<br>(527.8–<br>1000.0) | 631.7<br>(229.3–<br>1000.0) | 259.0<br>(0.0–6<br>66.0)  | 578.3<br>(188.7<br>–1000.<br>0) | 256.3<br>(0.0–77<br>4.0)    | 568.5<br>(0.0–6<br>02.3)        | 498.8<br>(0.0–5<br>81.0)        | 479.0<br>(95.3–<br>591.3)       | 632.3<br>(492.0<br>–1000.<br>0) | 593.7<br>(287.3<br>–1000.<br>0) | 759.7<br>(462.7<br>–1000.<br>0) | —                           | 189.7<br>(0.0–5<br>45.3)        | 323.7<br>(0.0–52<br>8.7)    | 428.3<br>(0.0–4<br>29.9)  | 215.7<br>(0.0–7<br>04.7)          | 170.3<br>(0.0–4<br>64.7)       | 218.3<br>(0.0–6<br>29.3)       |
| ZX         | 0.001    | 229.7<br>(0.0–55<br>6.0)    | 346.3<br>(0.0–55<br>0.0)    | 331.0<br>(16.7–<br>655.3) | 188.3<br>(0.0–5<br>05.3)        | 175.7<br>(0.0–50<br>4.7)    | 457.0<br>(110.7<br>–817.3<br>)  | 255.7<br>(0.0–6<br>89.3)        | 281.7<br>(0.0–7<br>00.0)        | 231.7<br>(0.0–6<br>71.3)        | 139.7<br>(0.0–4<br>30.7)        | 349.0<br>(0.0–7<br>83.3)        | 130.3<br>(0.0–43<br>6.7)    | —                               | 378.3<br>(4.7–75<br>1.3)    | 337.7<br>(0.0–7<br>59.3)  | 377.0<br>(11.3–<br>824.7)         | 200.3<br>(0.0–6<br>27.3)       | 157.0<br>(0.0–4<br>60.0)       |
| WZ         | 0.002    | 143.7<br>(0.0–39<br>6.7)    | 302.3<br>(0.0–59<br>9.3)    | 223.7<br>(0.0–5<br>86.0)  | 228.3<br>(0.0–7<br>94.7)        | 258.3<br>(0.0–67<br>4.0)    | 182.3<br>(0.0–6<br>57.3)        | 131.0<br>(0.0–4<br>14.7)        | 307.7<br>(0.0–6<br>60.7)        | 133.7<br>(0.0–3<br>75.3)        | 278.3<br>(0.0–6<br>68.0)        | 244.3<br>(0.0–6<br>01.3)        | 324.3<br>(0.0–69<br>1.3)    | 275.0<br>(0.0–5<br>43.3)        | —                           | 429.7<br>(0.0–6<br>03.3)  | 598.3<br>(328.7<br>–990.0<br>)    | 377.0<br>(0.0–4<br>32.0)       | 412.3<br>(18.0–<br>500.0)      |
| YY         | 0.002    | 254.3<br>(0.0–62<br>7.3)    | 722.3<br>(322.0–<br>1000.0) | 214.3<br>(0.0–5<br>48.0)  | 299.7<br>(0.0–6<br>81.3)        | 589.0<br>(213.3–<br>1000.0) | 566.3<br>(386.7<br>–1000.<br>0) | 722.3<br>(321.3<br>–1000.<br>0) | 588.3<br>(183.3<br>–975.3<br>)  | 513.0<br>(504.5<br>–1000.<br>0) | 604.8<br>(0.0–6<br>84.3)        | 531.7<br>(517.0<br>–988.7<br>)  | 481.0<br>(132.7–<br>714.0)  | 726.3<br>(402.7<br>–998.7<br>)  | 662.3<br>(276.0–<br>1000.0) | —                         | 297.7<br>(0.0–5<br>95.3)          | 517.0<br>(0.0–5<br>72.3)       | 353.0<br>(0.0–7<br>23.3)       |
| WS         | 0.002    | 720.3<br>(408.0–<br>1000.0) | 757.7<br>(531.3–<br>1000.0) | 445.0<br>(0.0–4<br>63.7)  | 606.3<br>(426.0<br>–1000.<br>0) | 662.3<br>(218.7–<br>1000.0) | 333.7<br>(0.0–4<br>18.7)        | 603.0<br>(203.3<br>–972.7<br>)  | 418.3<br>(0.0–4<br>79.3)        | 718.3<br>(389.3<br>–1000.<br>0) | 623.7<br>(334.7<br>–1000.<br>0) | 664.3<br>(295.3<br>–1000.<br>0) | 358.3<br>(0.0–68<br>9.3)    | 662.3<br>(206.7<br>–985.3<br>)  | 727.7<br>(280.7–<br>1000.0) | 482.4<br>(0.0–4<br>98.3)  | —                                 | 357.0<br>(0.0–7<br>80.0)       | 495.7<br>(115.3<br>–967.3<br>) |
| HZ         | 0.001    | 570.3<br>(555.5–<br>996.7)  | 528.3<br>(139.3–<br>965.3)  | 463.6<br>(0.0–4<br>88.3)  | 517.7<br>(154.7<br>–1000.<br>0) | 762.3<br>(465.3–<br>1000.0) | 547.4<br>(0.0–5<br>64.3)        | 507.9<br>(0.0–5<br>54.3)        | 635.7<br>(350.7<br>–991.3<br>)  | 274.3<br>(0.0–6<br>14.7)        | 459.0<br>(0.0–4<br>72.3)        | 353.0<br>(0.0–4<br>90.0)        | 745.0<br>(460.7–<br>1000.0) | 566.3<br>(203.3<br>–1000.<br>0) | 478.3<br>(126.7–<br>622.7)  | 471.7<br>(14.7–<br>662.7) | 595.0<br>(203.0<br>–1000.<br>0)   | —                              | 369.7<br>(0.0–7<br>08.7)       |
| JY         | 0.002    | 575.7<br>(323.3–<br>972.0)  | 572.3<br>(155.3–<br>974.7)  | 219.0<br>(0.0–6<br>80.0)  | 445.0<br>(41.3–<br>898.7)       | 566.0<br>(0.0–61<br>1.7)    | 772.3<br>(362.0<br>–1000.<br>0) | 277.7<br>(13.3–<br>559.3)       | 741.0<br>(517.3<br>–1000.<br>0) | 411.0<br>(0.0–1<br>000.0)       | 517.0<br>(475.9<br>–1000.<br>0) | 590.3<br>(316.0<br>–1000.<br>0) | 262.3<br>(0.0–72<br>1.3)    | 652.3<br>(170.0<br>–995.3<br>)  | 501.7<br>(74.0–8<br>90.0)   | 441.2<br>(0.0–4<br>54.3)  | 639.7<br>(236.7<br>–1000.<br>0.0) | 569.7<br>(300.7<br>–996.7<br>) | —                              |

Population abbreviations are defined in Table 1.  $\theta$ , mutation-scaled effective population size. M, mutation-scaled effective immigration rate. 95% highest probability density intervals are shown in parentheses.
